# Supplementary material for: Copper–cobalt peroxide nanoparticles: a biomimetic cascade reaction for enhanced Fenton-like therapy at physiologically relevant pH
Source: Royal Society of Chemistry journal article supplement (doi:10.1039/d4nr03135k), 2024-10-29
Supplement: d4nr03135k3.pdf [file d4nr03135k3.pdf]

## Supporting Information

### Copper-Cobalt Peroxide Nanoparticles: A Biomimetic Cascade Reaction for Enhanced Fenton-Like Therapy at Physiologically Relevant pH

Maryam Farrokhnia<sup>a</sup>, Hamed Manoochehri<sup>a\*</sup>, Ramón Martínez-Mañez<sup>c,d,e,f</sup>, Sadegh Karimi<sup>b\*</sup>

<sup>a</sup>*The Persian Gulf Marine Biotechnology Research Center, The Persian Gulf Biomedical Sciences Research Institute, Bushehr University of Medical Sciences, Bushehr, Iran*

<sup>b</sup>*Department of Chemistry, Faculty of Nano and Bio Science and Technology, Persian Gulf University, Bushehr, Iran*

<sup>c</sup>*Instituto Interuniversitario de Investigación de Reconocimiento Molecular y Desarrollo Tecnológico (IDM), Universitat Politècnica de València, Universitat de València, Camino de Vera s/n, 46022, Valencia, Spain*

<sup>d</sup>*CIBER de Bioingeniería, Biomateriales y Nanomedicina, Instituto de Salud Carlos III, Spain*

<sup>e</sup>*Unidad Mixta UPV-CIPF de Investigación en Mecanismos de Enfermedades y Nanomedicina, Universitat Politècnica de València, Centro de Investigación Príncipe Felipe, C/ Eduardo Primo Yúfera 3, 46100, Valencia, Spain*

<sup>f</sup>*Unidad Mixta de Investigación en Nanomedicina y Sensores, Universitat Politècnica de València, Instituto de Investigación Sanitaria La Fe, Av Fernando Abril Martorell 106, 46026 Valencia, Spain.*

**\*Corresponding authors:** Sadegh Karimi (sakarimi@pgu.ac.ir; karimi.sadegh@gmail.com), Hamed Manoochehri (manoochehry.hamed@gmail.com)

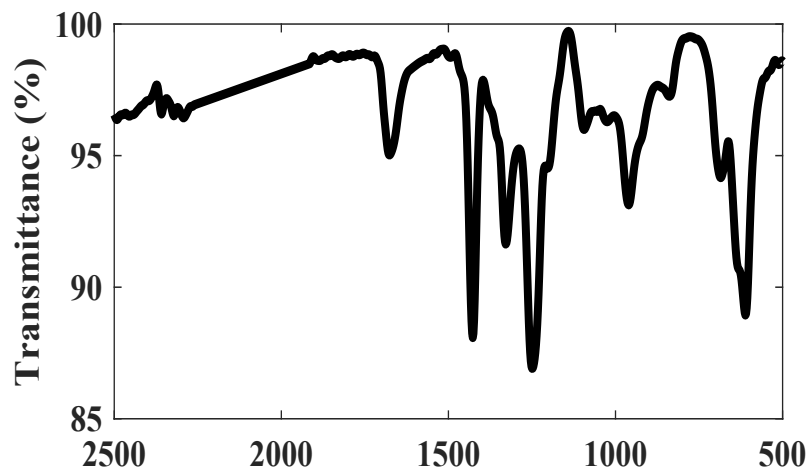

**Figure S1.** FTIR spectrum of PVP coated 7CCp NPs. The FTIR spectra was recorded in the wavenumber range of 500 to 2500  $\text{cm}^{-1}$  at room temperature

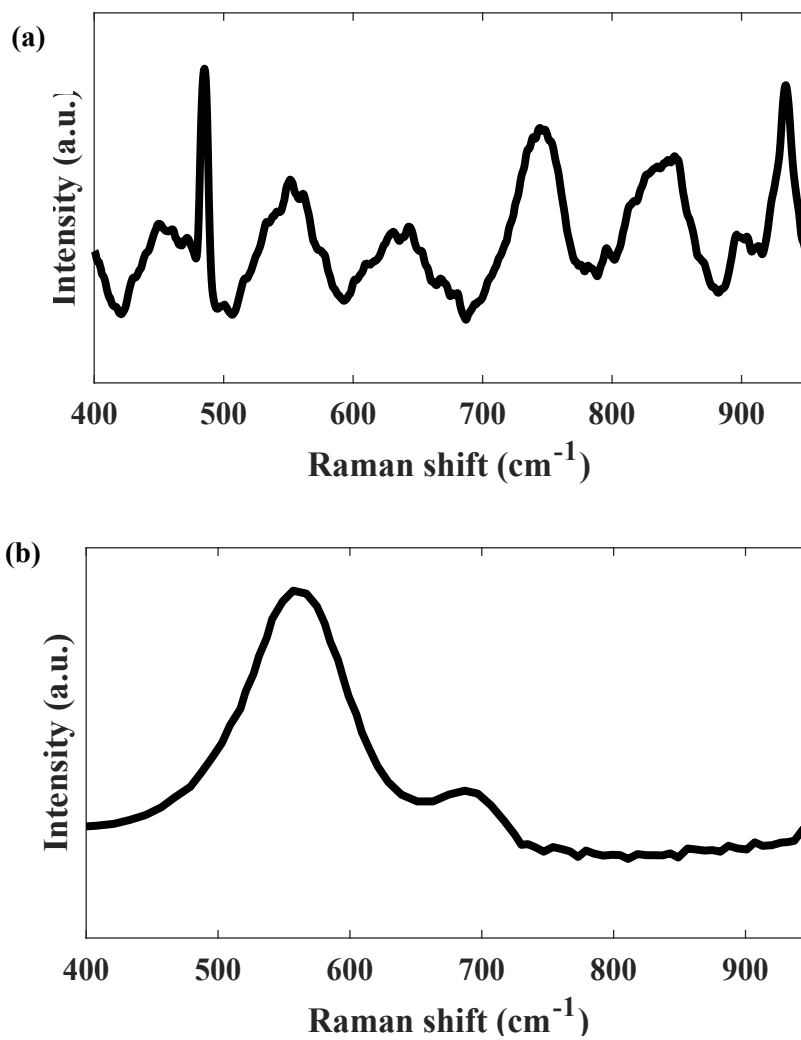

**Figure S2.** Raman spectrum of (a) PVP coated 7CCp NPs (b) Cobalt oxide. The Raman shift was recorded in the range of 400 to 950 cm<sup>-1</sup> at room temperature

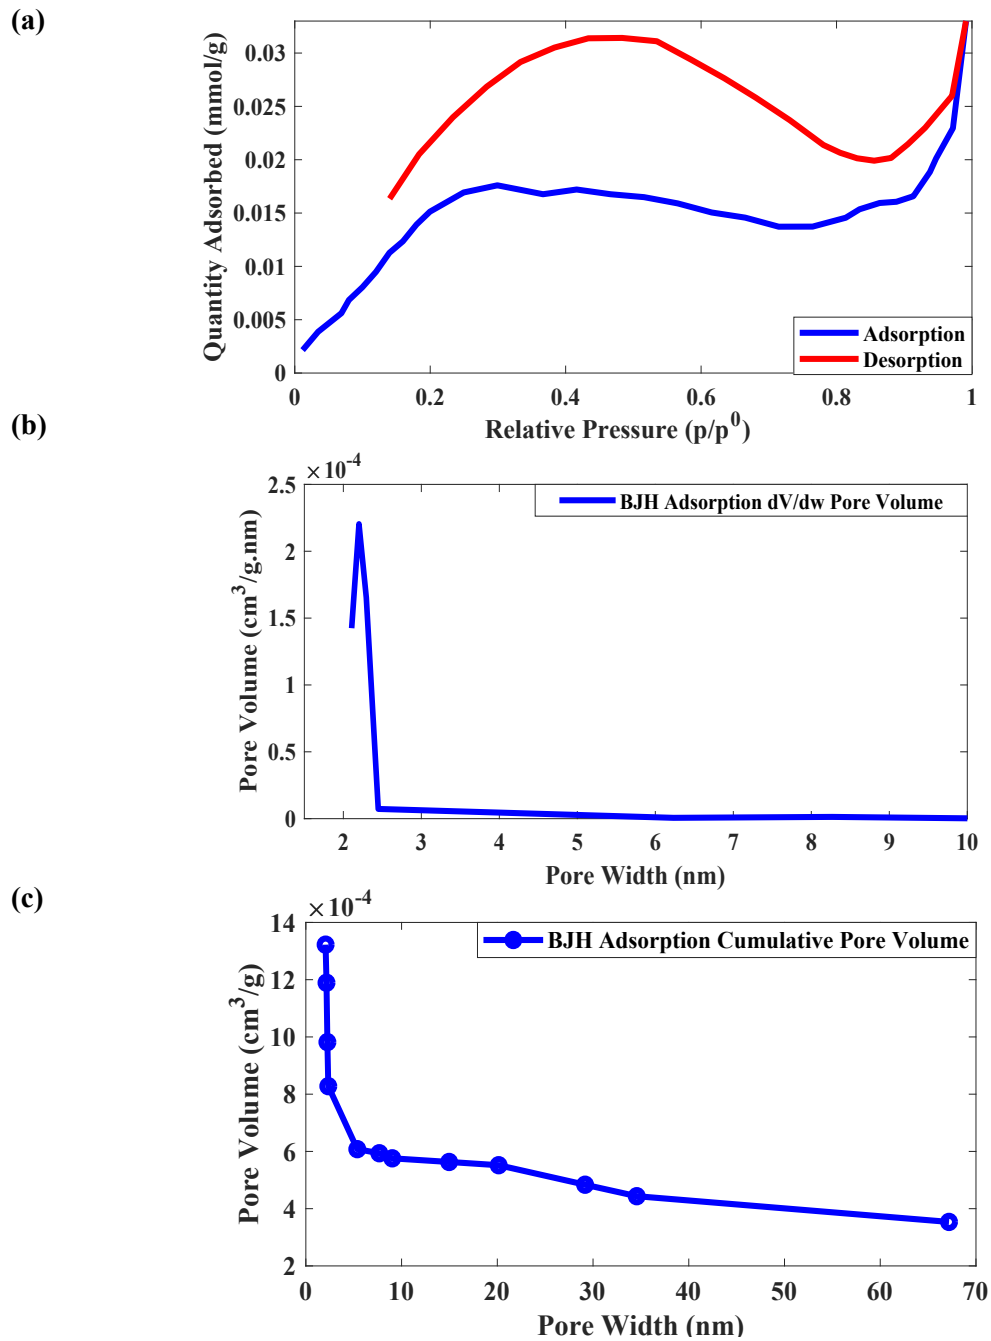

**Figure S3.** (a) BET nitrogen adsorption/desorption isotherms of 7CCp (b) BJH Adsorption dV/dw pore volume (c) BJH Adsorption cumulative pore volume

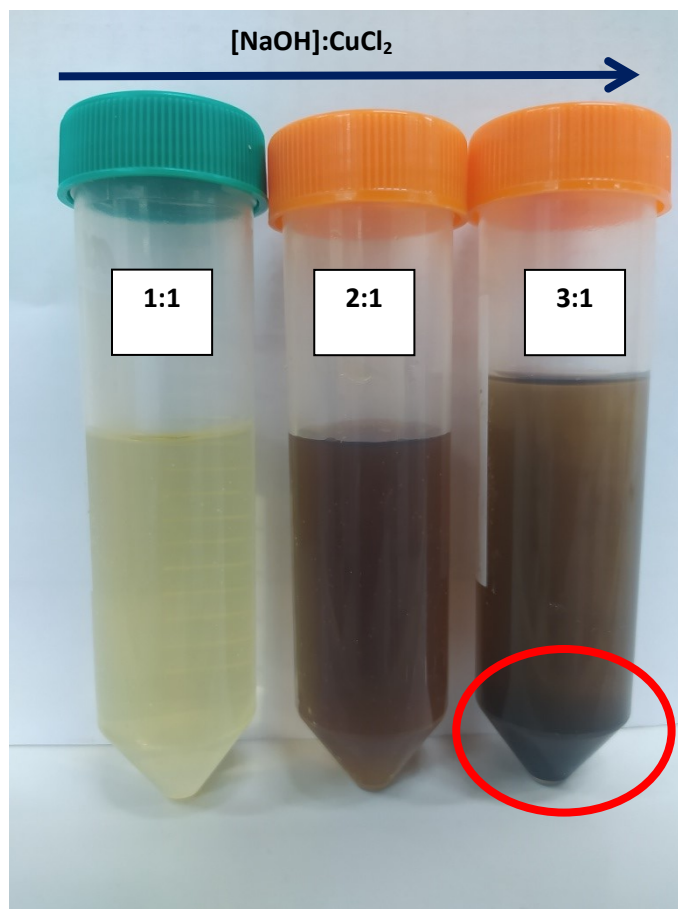

**Figure S4.** Photograph of 7CCp -NPs obtained in the presence of PVP at different molar ratios of NaOH to CuCl<sub>2</sub>. Unexpected precipitation (red circle) was observed during the synthetic process when the ratio was too high (3:1).

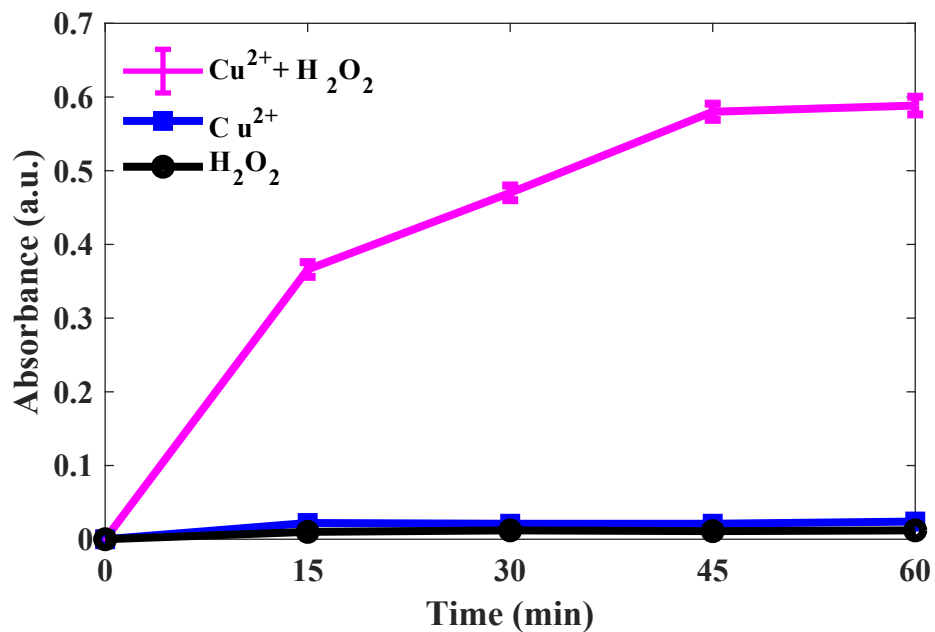

**Figure S5.** Absorbance intensity of TMB aqueous solution at 650 nm as a function of time  $[\text{Cu}^{2+}] = [\text{H}_2\text{O}_2] = 1 \text{ mM}$  and  $0.3 \text{ mg/mL}$  TMB at pH 5.4

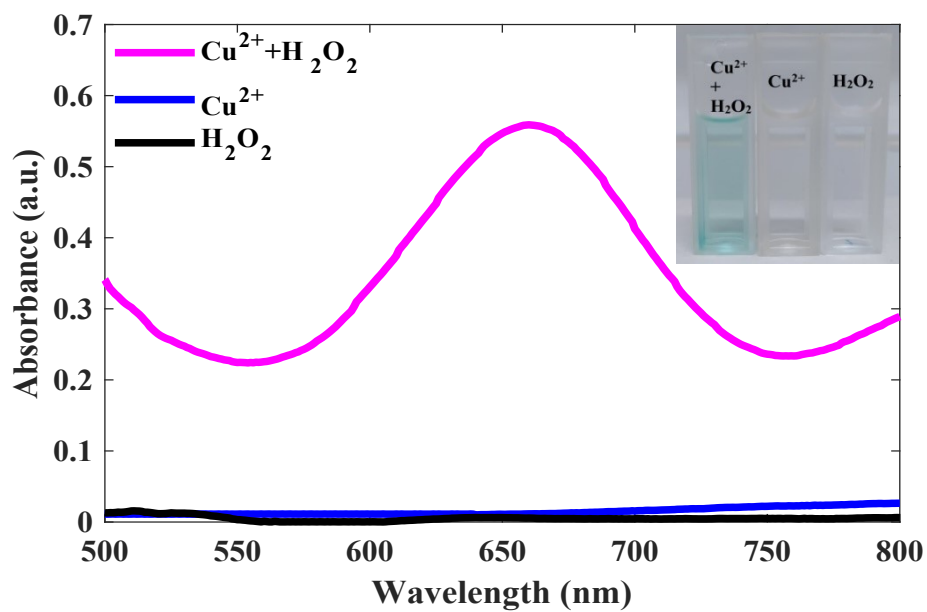

**Figure S6.** UV-vis spectra

and photographs (inset) of TMB aqueous solution treated with  $\text{H}_2\text{O}_2$ ,  $\text{Cu}^{2+}$ , and  $\text{Cu}^{2+}$  plus  $\text{H}_2\text{O}_2$  for 45 min. Note that the weak absorption between 500-800 nm at  $\text{Cu}^{2+}$ -treated group is from the  $\text{CuCl}_2$ .  $[\text{Cu}^{2+}] = [\text{H}_2\text{O}_2] = 1 \text{ mM}$  and  $0.3 \text{ mg/mL}$  TMB at pH 5.4

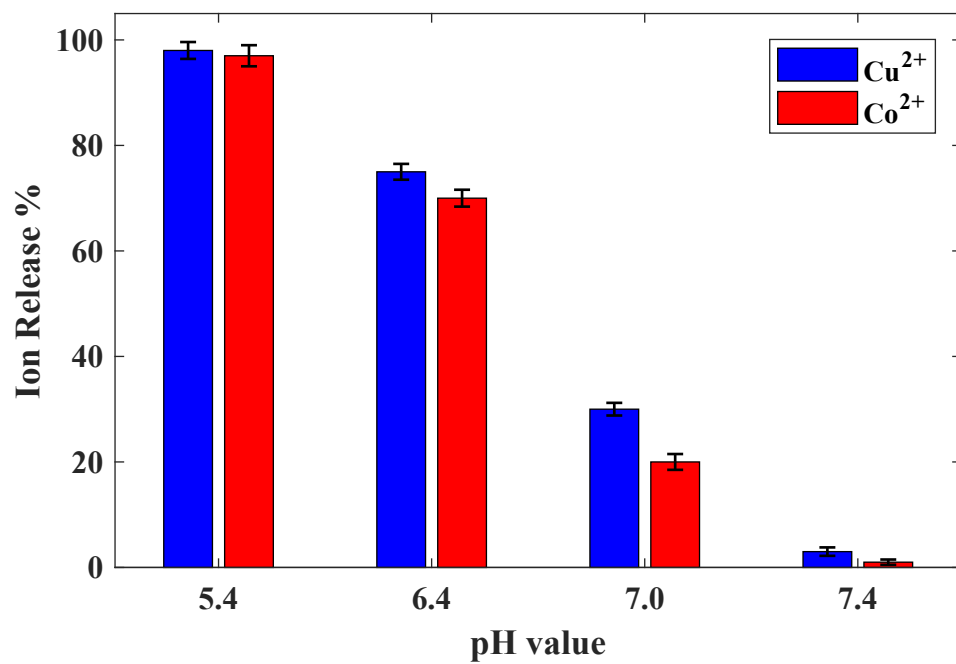

**Figure (S7).** The ion release of 7CCp-NPs under buffer solutions at varied pH values



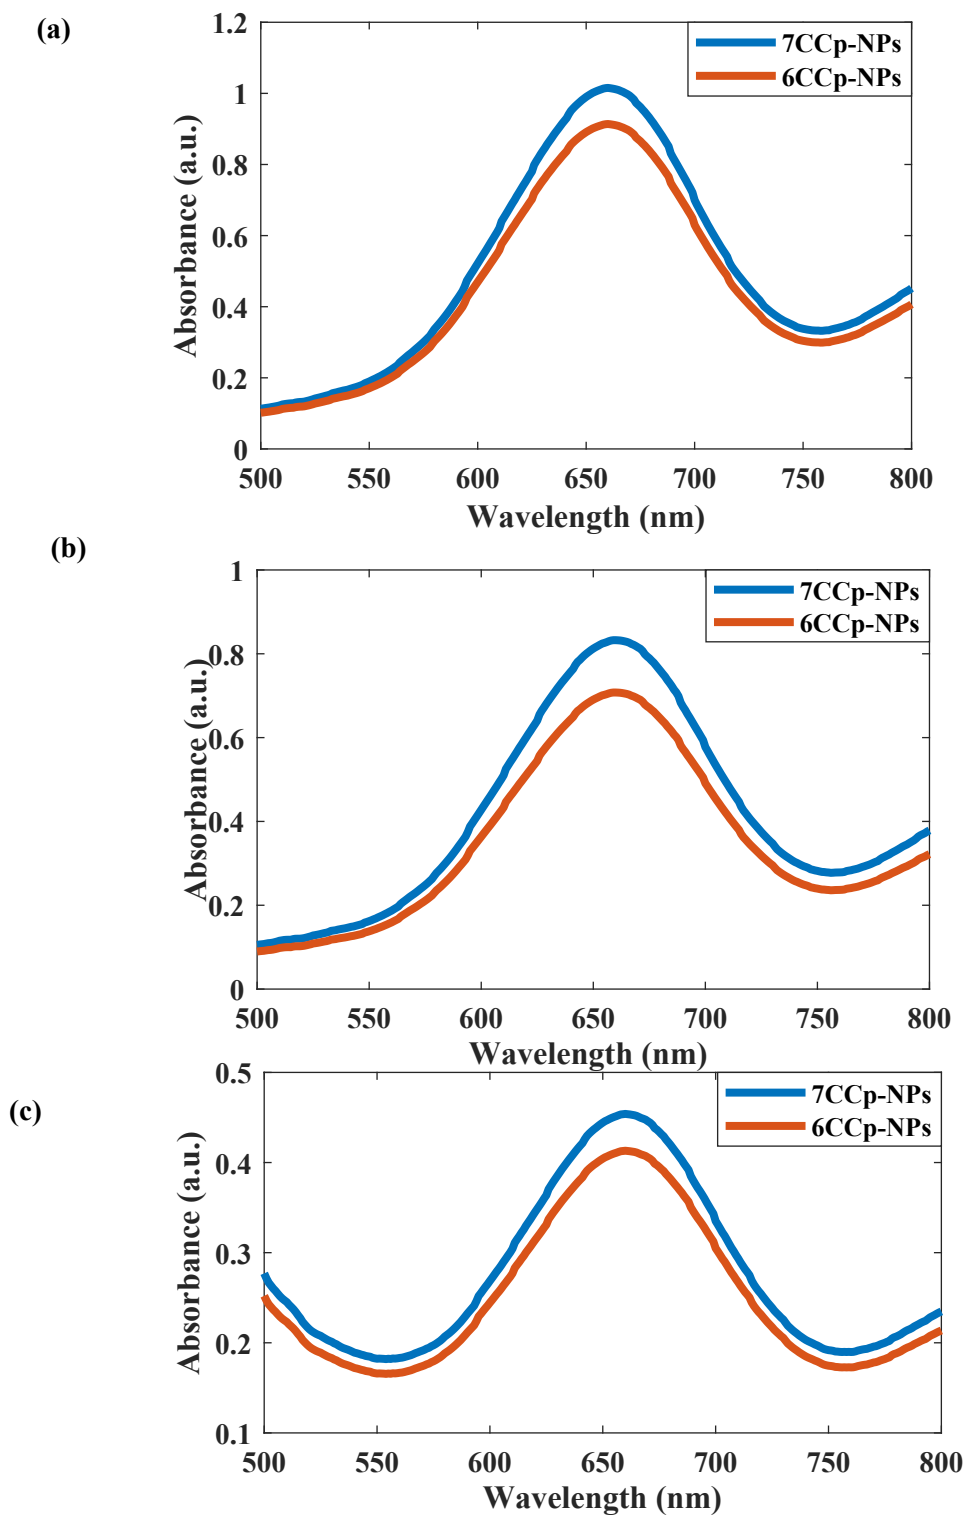

**Figure S8.** Comparison of the catalytic activity between 7CCp and 6CCp-NPs for oxidizing the TMB probe in different pH environments (a) pH 5.4 (b) pH 6.6 (c) pH 7.0

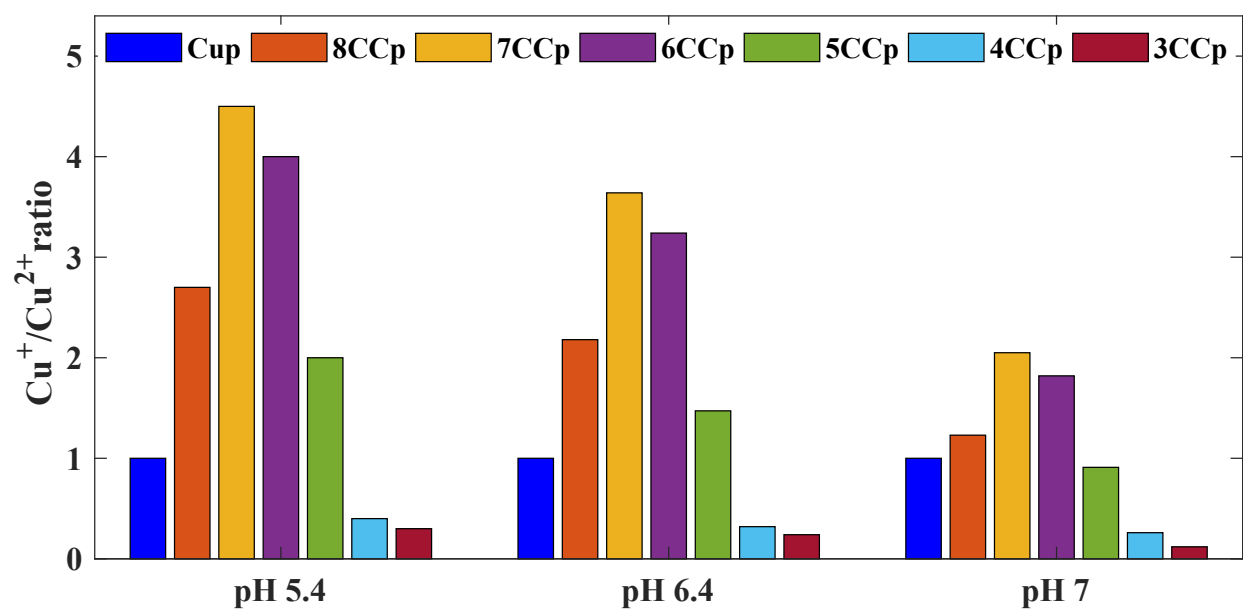

**Figure (S9).** The ratio of reduced Cu ions at different pH condition. All the data were normalized with respect to the ratios of Cup

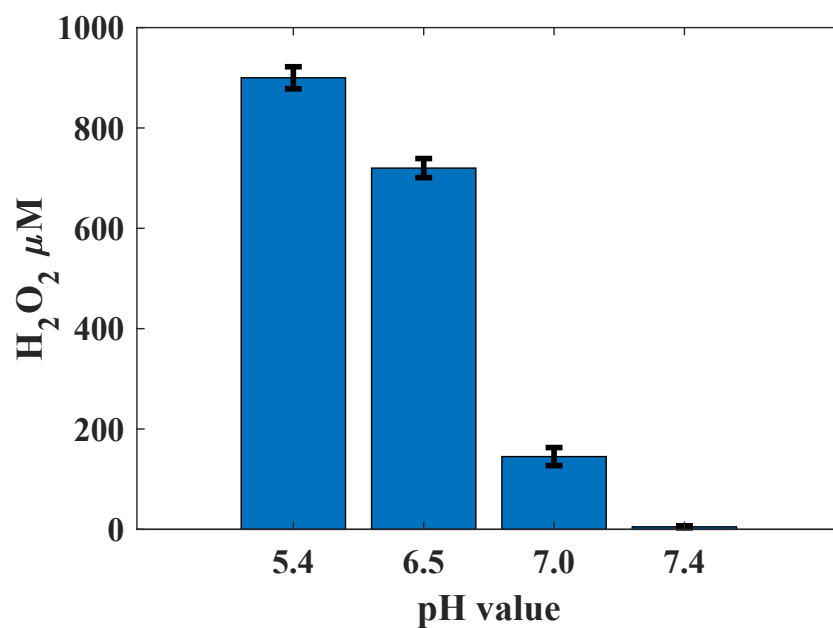

**Figure (S10).** The variations in H<sub>2</sub>O<sub>2</sub> generation in different pH values using Ti(SO<sub>4</sub>)<sub>2</sub>-Based colorimetric test.
